# Supplementary material for: Clinical and Molecular Features of KRAS-Mutated Lung Cancer Patients Treated with Immune Checkpoint Inhibitors
Source: MDPI journal article supplement (doi:10.3390/cancers14194933), 2022-10-08
Supplement: s1 [file s1]

List of keywords and abbreviations.

Table S1. Overall Survival and Associations with KRAS Co-mutations.

|          |                                                   |
|----------|---------------------------------------------------|
| CI       | Confidence interval                               |
| CDKN2A/B | Cyclin-dependent kinase inhibitor 2A/B            |
| EGFR     | Epidermal growth factor receptor                  |
| FANCA    | Fanconi anemia complementation group A            |
| GAs      | Genomic alterations                               |
| HR       | Hazard ratio                                      |
| ICIs     | Immune checkpoint inhibitors                      |
| IHC      | Immunohistochemistry                              |
| IRB      | Institutional review board                        |
| NGS      | Next-generation sequencing                        |
| NSCC-NOS | Non-small cell carcinoma, not otherwise specified |
| NSCLC    | Non-small cell lung cancer                        |
| OS       | Overall survival                                  |
| PD       | Progressive disease                               |
| PD-1     | Program death -1                                  |
| PD-L1    | Programmed death-ligand 1                         |
| PR       | Partial response                                  |
| OR       | Odds ratio                                        |
| TMB      | Tumor mutation burden                             |
| VS       | Versus                                            |
